# Supplementary material for: Renal cell neoplasias: reversion-inducing cysteine-rich protein with Kazal motifs discriminates tumor subtypes, while extracellular matrix metalloproteinase inducer indicates prognosis
Source: PubMed Central journal article supplement (PMC3853196; doi:10.1186/1479-5876-11-258), 2013-10-16
Supplement: 1479-5876-11-258-S1.pdf [file 1479-5876-11-258-S1.pdf]

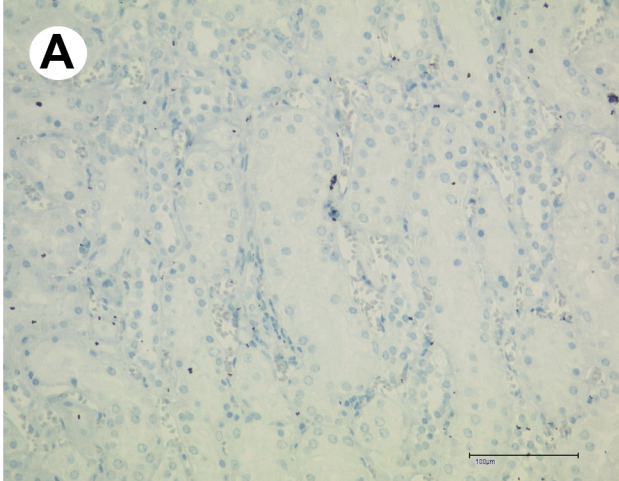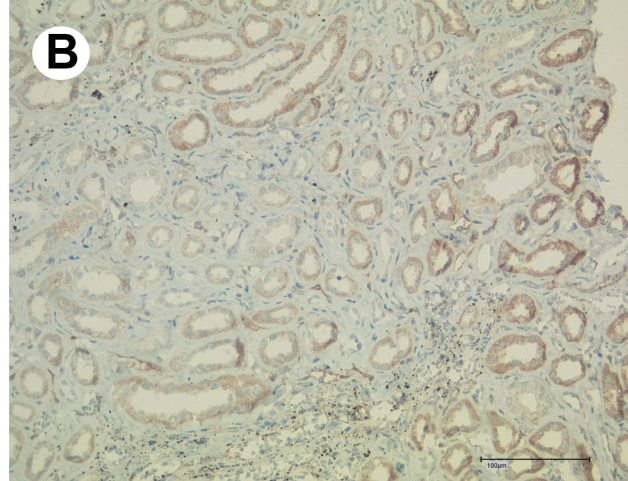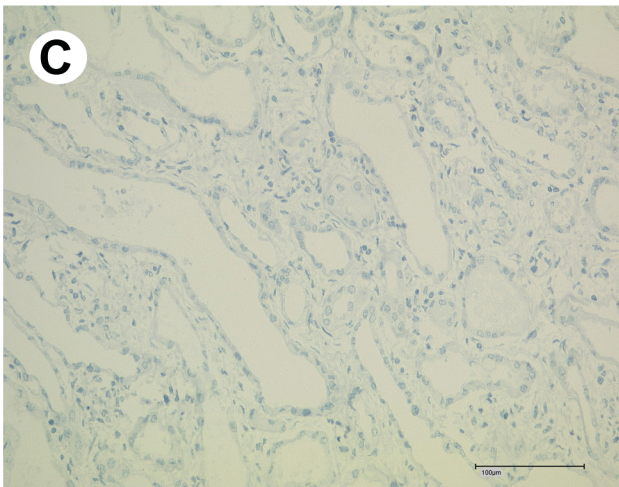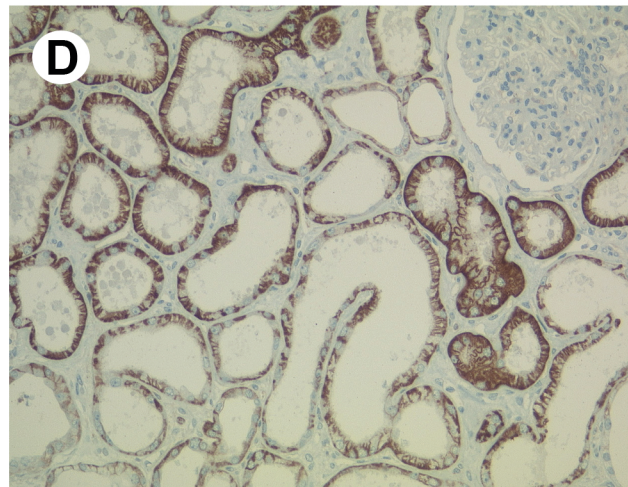

**Additional file 1:** Quality control for immunohistochemical stainings.  
Negative control: Staining of renal tissue without primary antibody is shown for RECK (A) and EMMPRIN (C). Positive control: RECK (B) and EMMPRIN (D) staining are shown for a well known renal tissue sample. Magnification: 200x.
